# Supplementary material for: LJM716 in Japanese patients with head and neck squamous cell carcinoma or HER2-overexpressing breast or gastric cancer
Source: PubMed Central journal article supplement (PMC5225197; doi:10.1007/s00280-016-3214-4), 2016-12-09
Supplement: 280_2016_3214_MOESM1_ESM.pdf [file 280_2016_3214_MOESM1_ESM.pdf]

**LJM716 in Japanese patients with head and neck squamous cell carcinoma or HER2-overexpressing breast or gastric cancer**

*Cancer Chemotherapy and Pharmacology*

Shunji Takahashi,<sup>1</sup> Takayuki Kobayashi,<sup>1</sup> Junichi Tomomatsu,<sup>1</sup> Yoshinori Ito,<sup>2</sup> Hisanobu Oda,<sup>3†</sup>  
Tatsuhiko Kajitani,<sup>3</sup> Tomoyuki Kakizume,<sup>4</sup> Takeshi Tajima,<sup>4</sup> Hiromi Takeuchi,<sup>4</sup> Heiko Maacke<sup>4</sup> and  
Taito Esaki<sup>3</sup>

<sup>1</sup>Department of Medical Oncology, The Cancer Institute Hospital of Japanese Foundation for Cancer Research, Tokyo, Japan; <sup>2</sup>Department of Breast Medical Oncology, The Cancer Institute Hospital of Japanese Foundation for Cancer Research, Tokyo, Japan; <sup>3</sup>Department of Gastrointestinal and Medical Oncology, National Hospital Organization Kyushu Cancer Center, Fukuoka, Japan; <sup>4</sup>Novartis Pharma K.K., Tokyo, Japan

Email: s.takahashi-chemotherapy@jfcr.or.jp

**Supplemental Table 1** Summary of criteria for dose-limiting toxicities (CTCAE version 4.03 grading)

|                                                                                                                                                                                                                                      |  |
|--------------------------------------------------------------------------------------------------------------------------------------------------------------------------------------------------------------------------------------|--|
| DLTs are specified for various organs not limited to hematology, renal, hepatic, cardiac, and pulmonary toxicities                                                                                                                   |  |
| Hematologic<br>≥ grade 3 neutropenia for >7 consecutive days, ≥ grade 3 (with clinical bleeding) or grade 4 thrombocytopenia, grade 4 anemia, febrile neutropenia                                                                    |  |
| Laboratory renal/hepatic<br>Serum creatinine >2 x ULN; ≥ grade 3 total bilirubin increased (or grade 2 with grade 3 ALT increased), grade 4 ALT increased (or grade 3 for >7 consecutive days for patients without liver metastases) |  |
| Cardiac and pulmonary<br>≥ grade 2 heart failure or ≥ grade 3 cardiac disorder; ≥ grade 3 (or grade 2 lasting >7 days in same cycle) pulmonary disorder                                                                              |  |
| Other<br>Other ≥ grade 3 non-hematologic toxicity or investigator-assessed unacceptable toxicity considered to be dose limiting                                                                                                      |  |
| Exceptions<br><72 hours of CTCAE grade 3 fatigue; alopecia, inadequately treated nausea, vomiting, or diarrhea; clinically non-significant, treatable, or reversible laboratory abnormalities                                        |  |
| <i>ALT</i> alanine aminotransferase, <i>AST</i> aspartate aminotransferase, <i>CTCAE</i> Common Terminology Criteria for Adverse Events, <i>DLTs</i> dose-limiting toxicities, <i>ULN</i> upper limit of normal                      |  |

**Supplemental Table 2** Duration of exposure to drug by treatment group

| Duration of exposure                | 10 mg/kg<br>QW<br>(n = 3) | 20 mg/kg<br>QW<br>(n = 3) | 40 mg/kg<br>QW<br>(n = 6) | All patients<br>(N = 12) |
|-------------------------------------|---------------------------|---------------------------|---------------------------|--------------------------|
| Median<br>(range)                   | 22<br>(20–24)             | 7<br>(4–32)               | 8<br>(6–48)               | 14<br>(4–48)             |
| Duration of exposure (weeks), n (%) |                           |                           |                           |                          |
| 1–4                                 | 0                         | 1 (33)                    | 0                         | 1 (8)                    |
| >4–8                                | 0                         | 1 (33)                    | 4 (67)                    | 5 (42)                   |
| >16                                 | 3 (100)                   | 1 (33)                    | 2 (33)                    | 6 (50)                   |

QW once weekly

**Supplemental Table 3** Adverse events ( $\geq 10\%$ ), suspected to be related to study treatment, by treatment group

| Preferred term, <i>n</i> (%)  | 10 mg/kg QW<br>( <i>n</i> = 3) | 20 mg/kg QW<br>( <i>n</i> = 3) | 40 mg/kg QW<br>( <i>n</i> = 6) | All patients<br>( <i>N</i> = 12) |
|-------------------------------|--------------------------------|--------------------------------|--------------------------------|----------------------------------|
| Diarrhea                      | 2 (67)                         | 1 (33)                         | 3 (50)                         | 6 (50)                           |
| Stomatitis                    | 3 (100)                        | 0                              | 0                              | 3 (25)                           |
| Fatigue                       | 1 (33)                         | 1 (33)                         | 1 (17)                         | 3 (25)                           |
| Pyrexia                       | 0                              | 0                              | 3 (50)                         | 3 (25)                           |
| Paronychia                    | 2 (67)                         | 0                              | 1 (17)                         | 3 (25)                           |
| Nausea                        | 1 (33)                         | 0                              | 1 (17)                         | 2 (17)                           |
| Edema peripheral              | 1 (33)                         | 0                              | 1 (17)                         | 2 (17)                           |
| Pruritus                      | 1 (33)                         | 0                              | 1 (17)                         | 2 (17)                           |
| Rash                          | 1 (33)                         | 0                              | 1 (17)                         | 2 (17)                           |
| Peripheral sensory neuropathy | 0                              | 1 (33)                         | 1 (17)                         | 2 (17)                           |
| Cough                         | 1 (33)                         | 0                              | 1 (17)                         | 2 (17)                           |
| Anemia                        | 0                              | 0                              | 2 (33)                         | 2 (17)                           |
| Lymphocyte count decreased    | 0                              | 0                              | 2 (33)                         | 2 (17)                           |

QW once weekly
